# Supplementary material for: Barrmaelia and Entosordaria in Barrmaeliaceae (fam. nov., Xylariales) and critical notes on Anthostomella-like genera based on multigene phylogenies
Source: PubMed Central journal article supplement (PMC5801398; doi:10.1007/s11557-017-1329-6), 2017-08-23

Strict consensus of 4 most parsimonious trees of score 32311

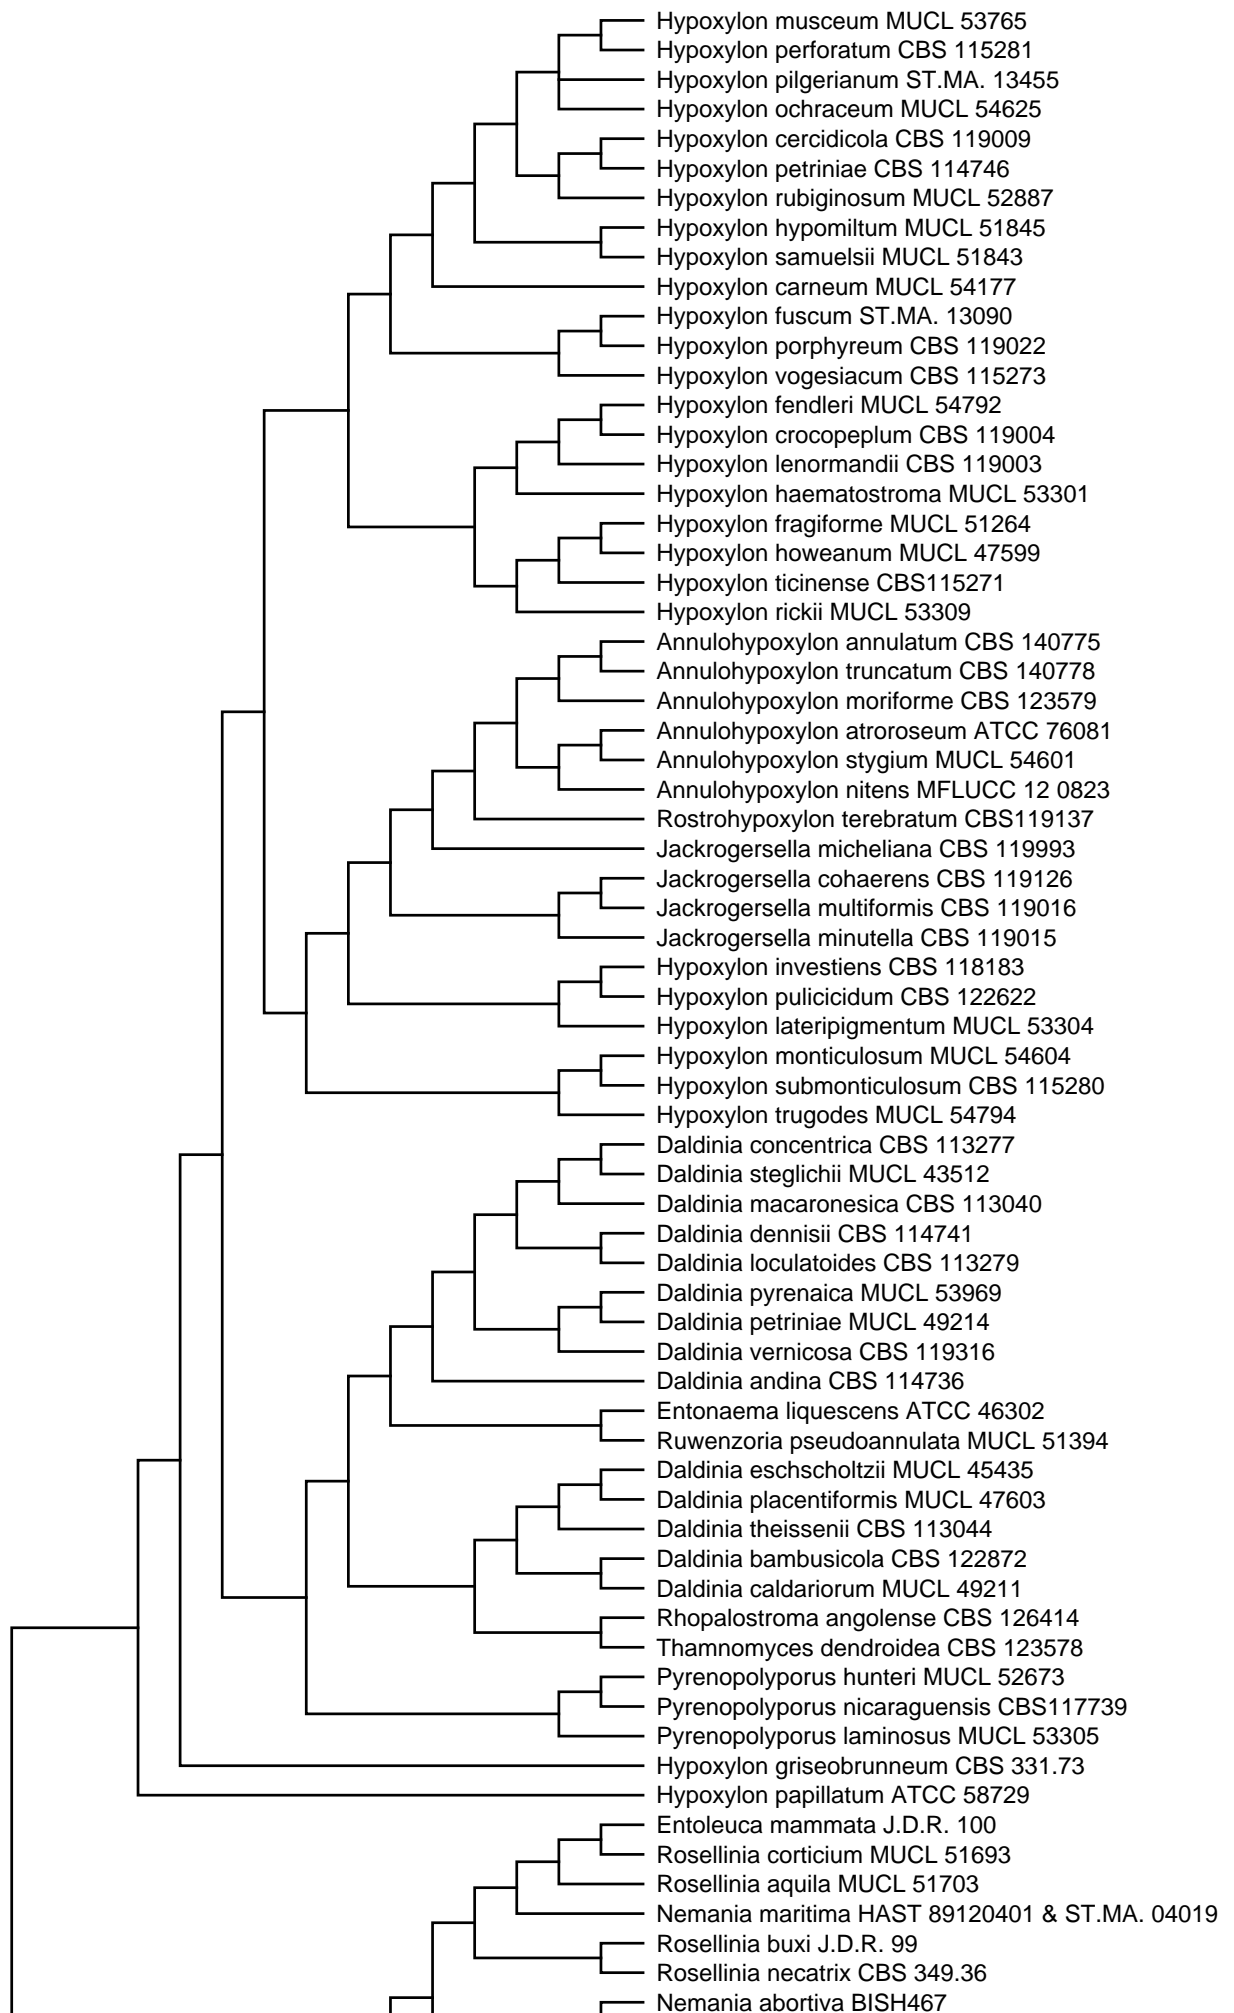

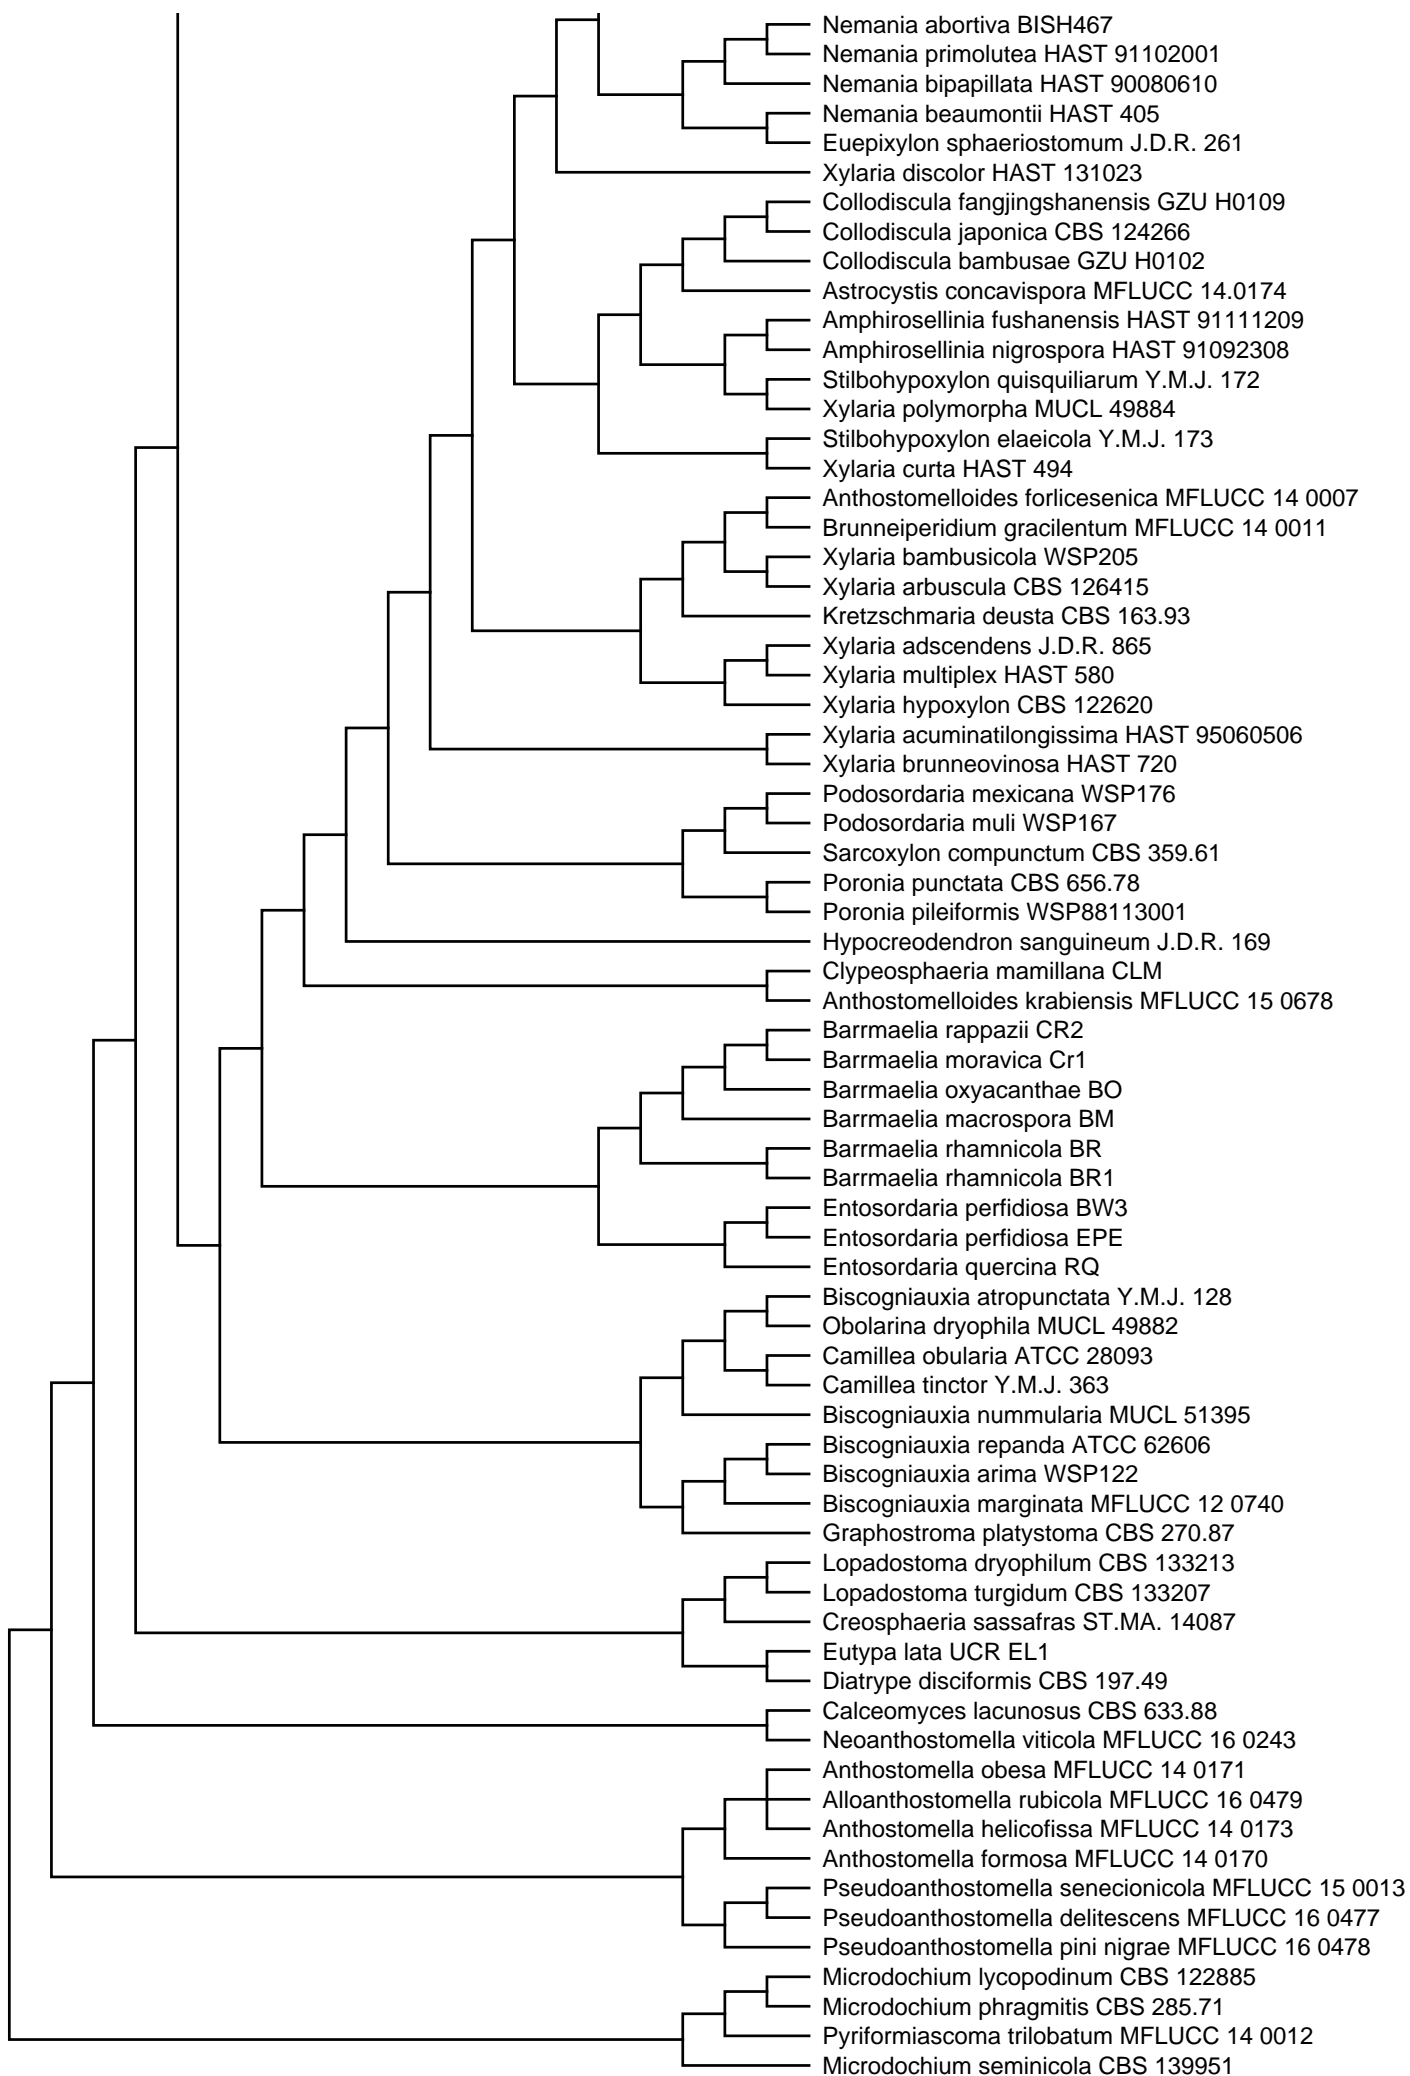

Supplement: 11557_2017_1329_MOESM1_ESM.pdf [file 11557_2017_1329_MOESM1_ESM.pdf]
